# Supplementary material for: A concerted mechanism involving ACAT and SREBPs by which oxysterols deplete accessible cholesterol to restrict microbial infection
Source: eLife journal article supplement (doi:10.7554/elife.83534), 2023-01-25

Figure 2 - Source Blots

A

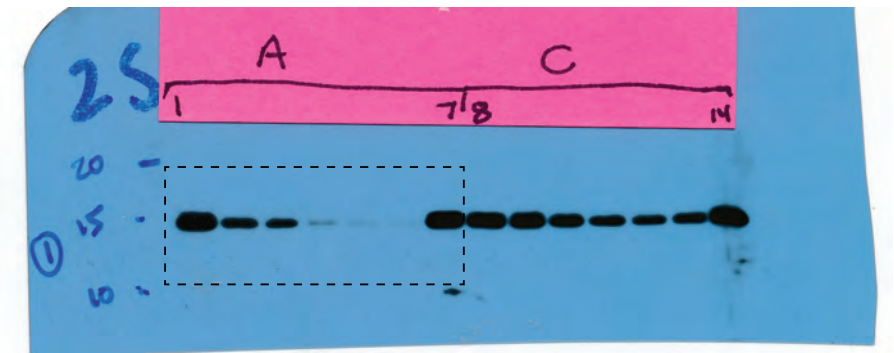

ALOD4/His for WT cells

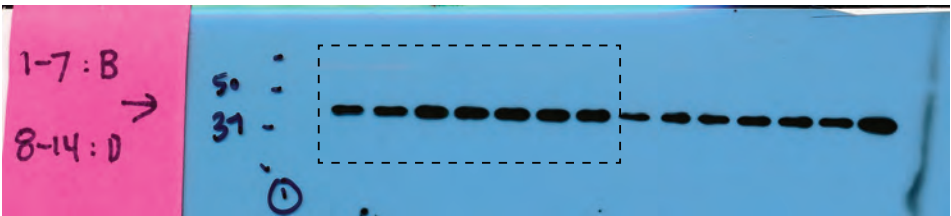

Actin for WT cells

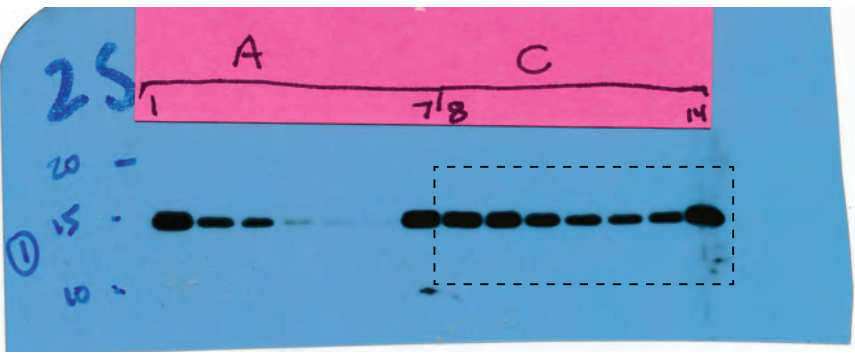

ALOD4/His for ACAT1 KO cells

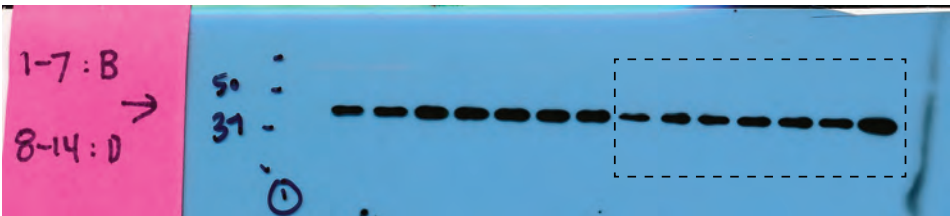

Actin for ACAT1 KO cells

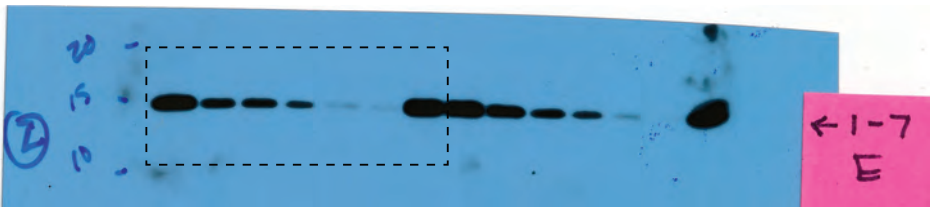

ALOD4/His  
for ACAT1 KO;hACAT1(WT)  
cells

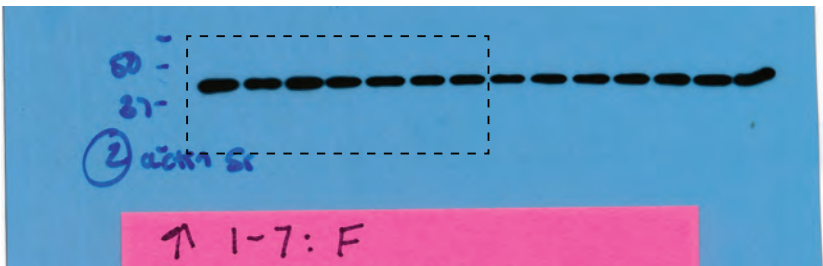

Actin  
for ACAT1 KO;hACAT1(WT)  
cells

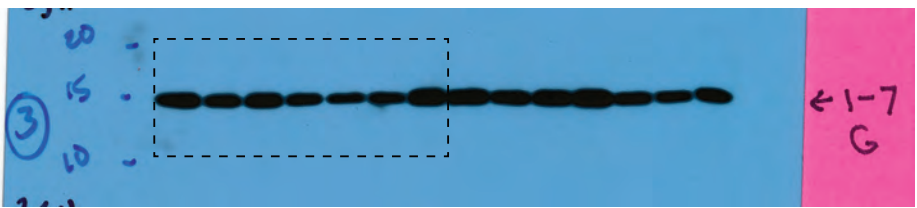

ALOD4/His  
for ACAT1 KO;hACAT1(H460A)  
cells

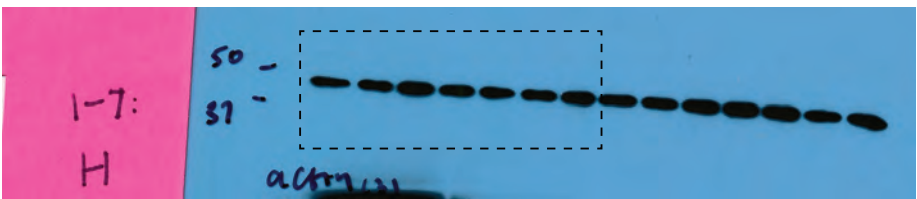

Actin  
for ACAT1 KO;hACAT1(H460A)  
cells

C

ALOD4/His  
for WT cells

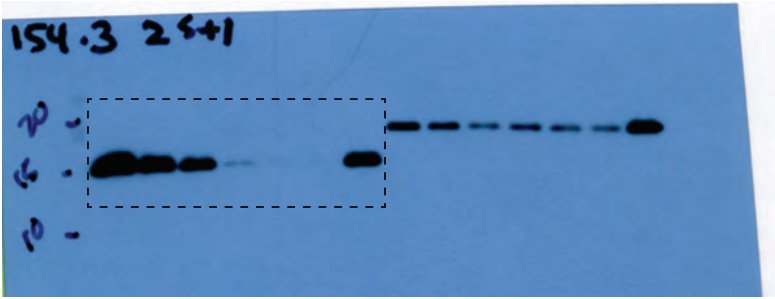

Actin  
for WT cells (ALOD4)

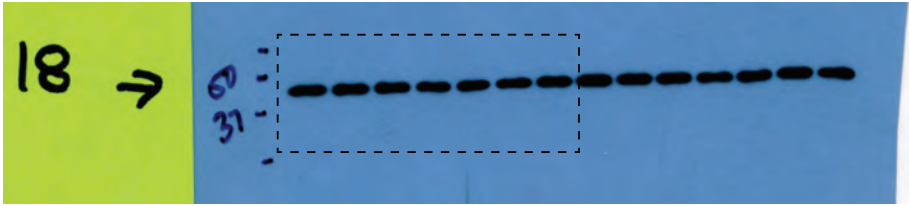

ALOD4/His for  
SCAP-deficient  
cells

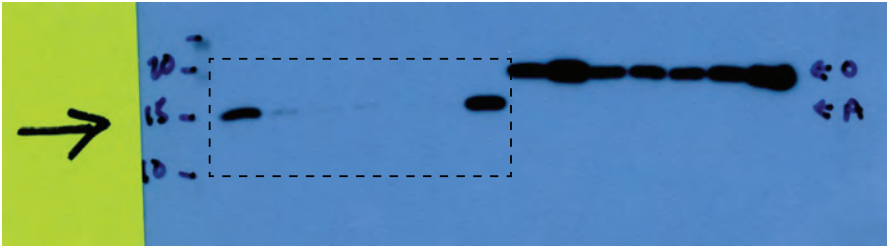

Actin  
for SCAP-deficient cells  
(ALOD4)

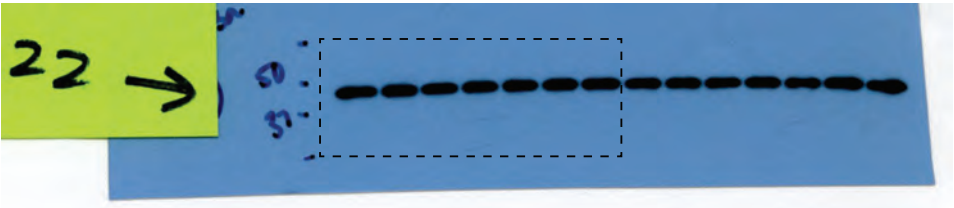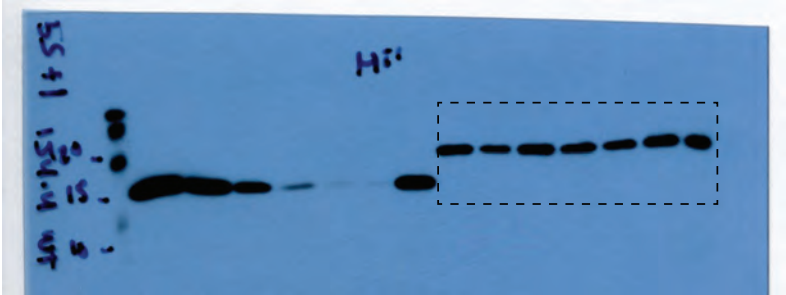

OlyA/His  
for WT cells

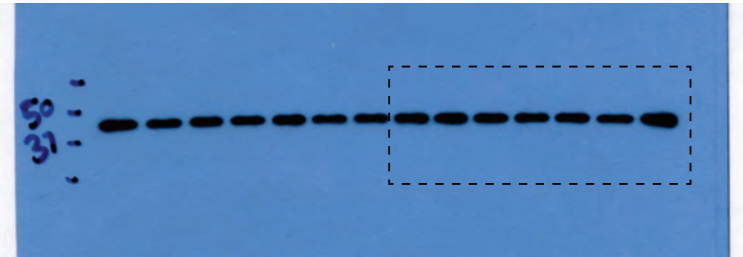

Actin  
for WT cells (OlyA)

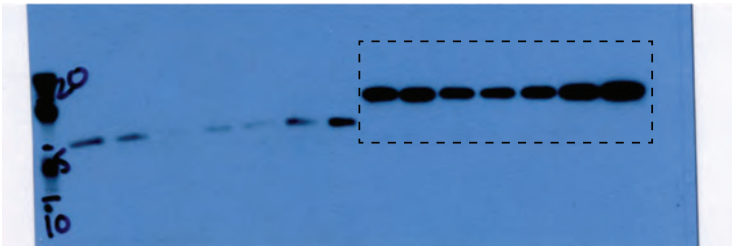

OlyA/His  
for SCAP-  
deficient cells

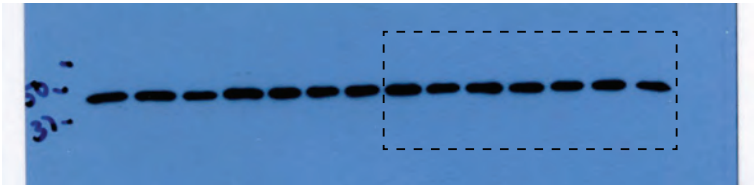

Actin  
for SCAP-deficient  
cells (OlyA)



D

ALOD4/His  
for WT cells

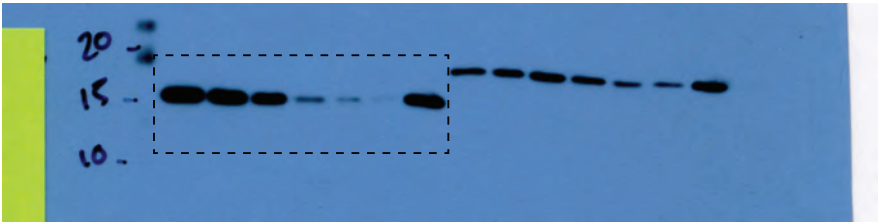

Actin  
for WT cells (ALOD4)

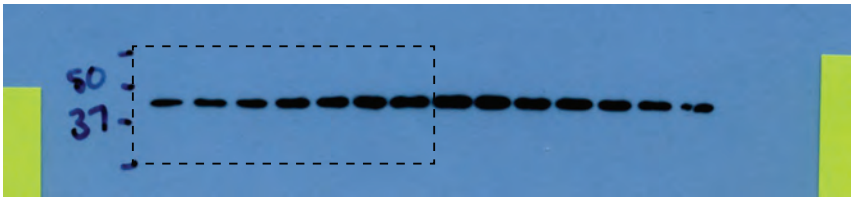

ALOD4/His  
for LXRα/β-  
deficient cells

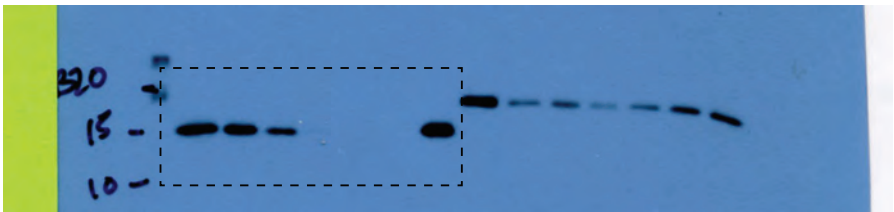

Actin for  
LXRα/β-deficient cells  
(ALOD4)

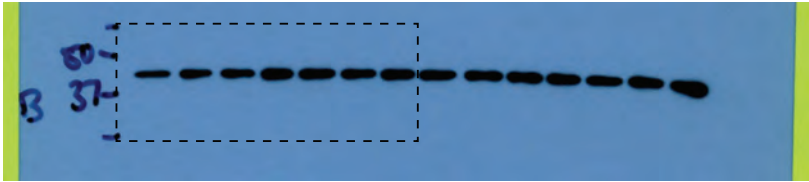

OlyA/His  
for WT cells

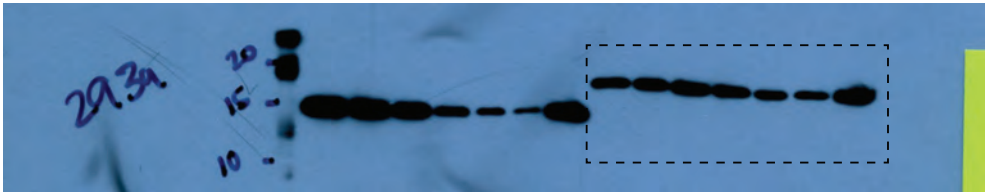

Actin  
for WT cells (OlyA)

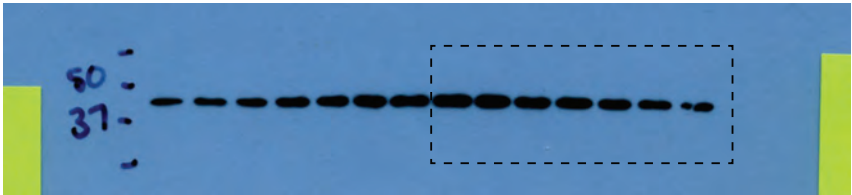

OlyA/His  
for LXRα/β-  
deficient cells

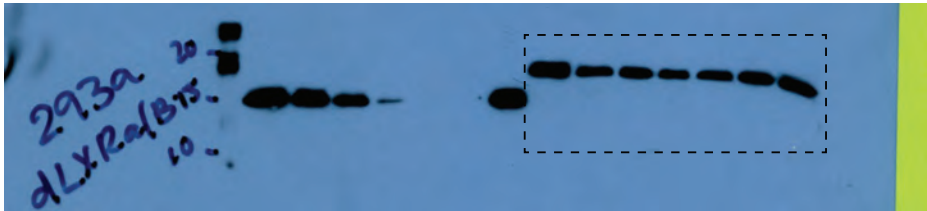

Actin for  
LXRα/β-deficient cells  
(OlyA)

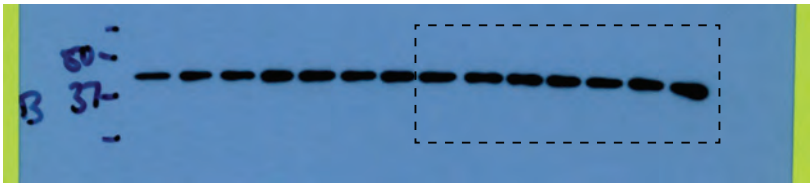

Supplement: fig2-data1 [file elife-83534-fig2-data1-v3.zip]
