# Supplementary material for: A concerted mechanism involving ACAT and SREBPs by which oxysterols deplete accessible cholesterol to restrict microbial infection
Source: eLife journal article supplement (doi:10.7554/elife.83534), 2023-01-25
Supplement: fig1-data2 [file Figure 1-source data 2.xlsx]

## Sheet: Figure 1F
Figure Label	-	A	B	C	D	E	F	G	H	I	J	K
Treatment	Vehicle	4HC	7HC	19HC	20(R)HC	22(R)HC	22(S)HC	24(R)HC	24(S)HC	25HC	27HC	25HC-3-sulf
Mean	0.0928651	0.108175	0.23794	0.217359	0.656501	0.143615	0.248704	0.690914	0.791851	1	1.67934	0.245759
SEM	0.0336433	0.042429	0.0250774	0.0324173	0.13323	0.0613004	0.0683592	0.124667	0.201363	0	0.131399	0.0110343

## Sheet: Figure 1 figure supplement 1B
	Figure Label	-	A	B	C	D	E	F	G	H	I	J	K
	Oxysterol	Vehicle	4HC	7HC	19HC	20(R)HC	22(R)HC	22(S)HC	24(R)HC	24(S)HC	25HC	27HC	25HC-3-sulfate
Bound	Mean (n = 3)	100	96.22	90.04	91.61	9.48	89.77	104.52	21.97	14.41	4.18	4.39	64.66
ALOD4	SEM	0	2.06	8.89	5.12	4.47	9.21	3.19	4.65	8.03	1.25	2.41	9.54

## Sheet: Figure 1 figure supplement 1C
	Figure Label	-	A	B	C	D	E	F	G	H	I	J	K
	Oxysterol	Vehicle	4HC	7HC	19HC	20(R)HC	22(R)HC	22(S)HC	24(R)HC	24(S)HC	25HC	27HC	25HC-3-sulfate
Bound	Mean (n = 3)	100	104.96	96.15	102.8	87.68	85.13	99.57	89.38	88.53	83.72	85.6	94.28
OlyA	SEM	0	4.07	2	7.59	5.62	5.77	8.51	4.1	2.73	7.38	6.25	6.2

## Sheet: Figure 1 figure supplement 3A
Figure Key	A		B		C		D		E		F		G		H		I		J		K
Treatment	4HC		7HC		19HC		20(R)HC		22(R)HC		22(S)HC		24(R)HC		24(S)HC		25HC		27HC		25HC-3-sulfate
0	100	0	100	0	100	0	100	0	100	0	100	0	100	0	100	0	100	0	100	0	100	0
1	96.1582	12.3132	95.3977	4.59273	95.1403	9.42678	71.577	11.2087	80.882	2.7654	93.5455	14.4411	50.3216	4.38073	82.7023	13.8139	20.1394	8.48668	45.072	17.0765	67.1439	4.07557
2.5	94.8183	3.71098	97.7282	7.85658	95.6064	18.2046	30.218	10.4317	81.6395	7.93053	83.1758	12.6624	29.6786	11.9376	66.1482	11.5191	5.58061	1.03974	7.26162	1.86607	63.9086	9.02702
5	97.0469	5.70559	102.442	12.3789	106.612	24.3153	17.9818	6.73448	79.5963	9.79412	81.2521	15.6319	30.7535	7.42731	52.4984	15.803	3.48519	1.52463	5.55547	0.828714	59.9468	3.32255
10	99.2534	3.37807	85.9144	8.42005	116.423	27.7059	12.0648	3.03546	81.5636	10.9958	83.8958	15.1887	19.7116	9.22041	34.8535	5.21733	3.19973	1.4216	5.47405	0.942326	59.9528	5.04208
25HC (µM)	Mean	SEM	Mean	SEM	Mean	SEM	Mean	SEM	Mean	SEM	Mean	SEM	Mean	SEM	Mean	SEM	Mean	SEM	Mean	SEM	Mean	SEM

## Sheet: Figure 1 figure supplement 3B
Figure Label	D		G		H		I		J
Treatment	20(R)HC		24(R)HC		24(S)HC		25HC		27HC
0	100	0	100	0	100	0	100	0	100	0
0.25	72.4106	12.4066	84.8964	11.6971	94.8545	16.1812	62.871	11.0575	46.1841	10.0543
0.5	54.2325	6.83287	81.4031	8.54352	86.2294	16.6605	59.4749	7.76441	43.8008	11.9905
1	27.8138	5.18204	73.3434	2.6733	64.9727	16.409	29.9618	6.77314	26.6865	13.6076
2	16.8076	5.02859	62.0222	14.1612	55.7537	29.8686	16.7439	3.56833	17.9294	11.2149
4	9.97245	6.36685	23.071	10.247	12.0775	3.75889	6.0999	0.999687	5.7639	2.65976
Time (h)	Mean (n=3)	SEM	Mean (n=3)	SEM	Mean (n=3)	SEM	Mean (n=3)	SEM	Mean (n=3)	SEM

## Sheet: Figure 1 figure supplement 4B
Figure Label	-	A	B	C	D	E	F	G	H	I	J	K	HPCD
Treatment	Vehicle	4HC	7HC	19HC	20(R)HC	22(R)HC	22(S)HC	24(R)HC	24(S)HC	25HC	27HC	25HC-3-sulfate	1% HPCD
Mean (n = 3)	100	93.14	95.3967	98.7233	107.267	100.29	106.753	93.82	117.683	95.22	103.007	111.863	11.6233
SEM	0	3.9007	8.86177	11.0453	2.88636	10.9864	5.59342	3.50129	5.32779	4.26578	8.36616	2.52666	1.49552

## Sheet: Figure 1 figure supplement 5
	Figure Label	-	A	B	C	D	E	F	G	H	I	J	K
	Oxysterol	Vehicle	4HC	7HC	19HC	20(R)HC	22(R)HC	22(S)HC	24(R)HC	24(S)HC	25HC	27HC	25HC-3-sulfate
Nuclear	Mean (n = 3)	100	92.04	21.7	85.49	5.58	6.38	72.02	4.37	8.68	2.04	2.2	4.22
SREBP2	SEM	0	1.99	4.52	6.74	2.9	4.11	8.61	1.15	2.95	0.63	1.86	2.54
