# Supplementary material for: A concerted mechanism involving ACAT and SREBPs by which oxysterols deplete accessible cholesterol to restrict microbial infection
Source: eLife journal article supplement (doi:10.7554/elife.83534), 2023-01-25
Supplement: fig2-figsupp1-data2 [file Figure 2-figure supplement 1-source data 2.xlsx]

## Sheet: Figure 2 figure supplement 1D
	Cell Type
25HC (µM)	WT		ACAT1 KO		ACAT1 KO; hACAT1(WT)		ACAT1 KO; hACAT1(H460A)
0	0.261122	0.0128458	0.112625	0.0147818	0.875008	0.0544599	0.139028	0.0205584
5	3.0206	0.191133	0.14087	0.0147818	5.36418	0.476946	0.135364	0.0319864
	Mean (n=3)	SEM	Mean (n=3)	SEM	Mean (n=3)	SEM	Mean (n=3)	SEM
