# Supplementary material for: A concerted mechanism involving ACAT and SREBPs by which oxysterols deplete accessible cholesterol to restrict microbial infection
Source: eLife journal article supplement (doi:10.7554/elife.83534), 2023-01-25
Supplement: fig2-figsupp2-data1 [file Figure 2-figure supplement 2-source data 1.xlsx]

## Sheet: Figure 2 figure supplement 2
CHO-K1	WT		ACAT1 KO		ACAT1 KO;		ACAT1 KO;
Cell Line					hACAT1(WT)		hACAT1(H460A)
25HC (µM)
0	100	0	100	0	100	0	100	0
0.5	60.75	8.83	106.46	11.09	65.22	4.92	96.85	7.18
1	36.34	5.31	95.32	7	57.1	8.66	102.13	6.19
2.5	16.52	3.73	86.09	5.91	22.52	7.43	95.49	8.16
5	6.51	3.36	77.88	9.62	9.23	6.63	95.55	10.07
10	2.68	0.35	79.3	5.26	6.24	1.63	83.08	6.12
	Mean (n=3)	SEM	Mean (n=3)	SEM	Mean (n=3)	SEM	Mean (n=3)	SEM
