# Supplementary material for: A concerted mechanism involving ACAT and SREBPs by which oxysterols deplete accessible cholesterol to restrict microbial infection
Source: eLife journal article supplement (doi:10.7554/elife.83534), 2023-01-25

## Figure 2 figure supplement 3 - Source Blots

SREBP2/7D4  
for WT cells

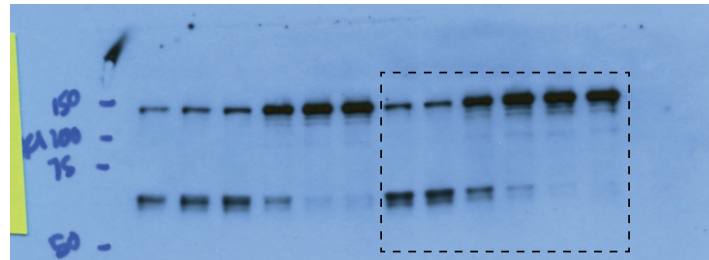

SREBP2/7D4  
for ACAT1 KO  
cells

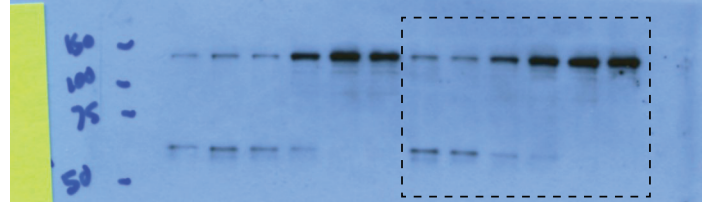

SREBP2/7D4 for ACAT1  
KO;hACAT1(WT) cells

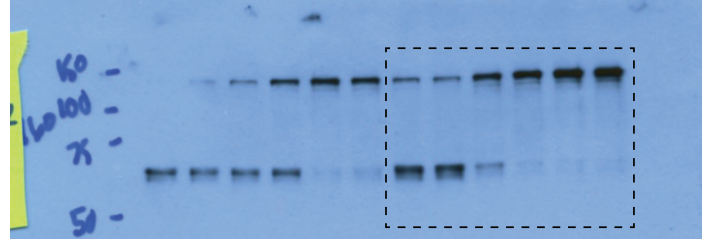

SREBP2/7D4 for  
ACAT1 KO;hACAT1(H460A)  
cells

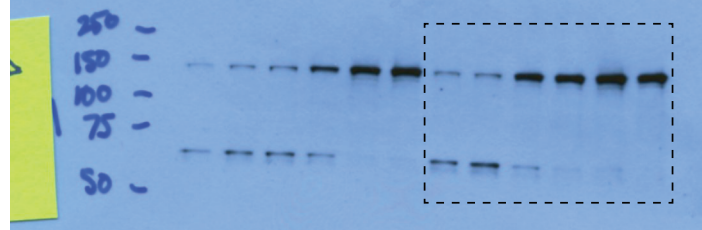

Actin  
WT cells

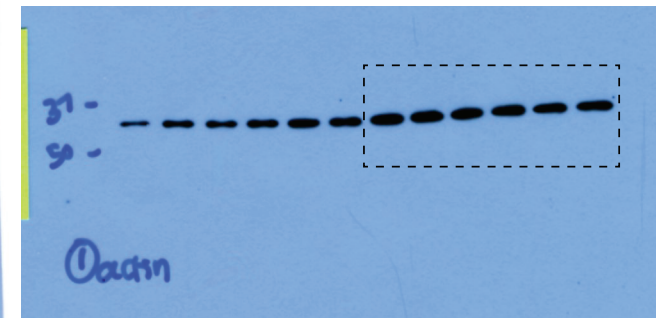

Actin ACAT1  
KO cells

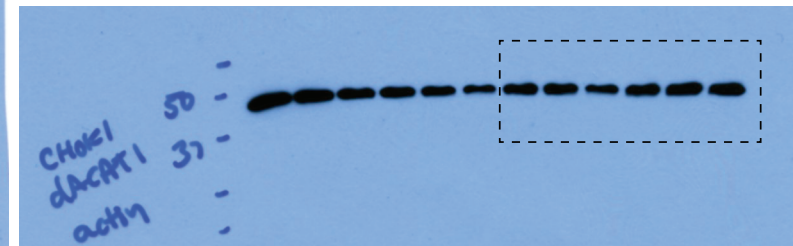

Actin  
ACAT1 KO;hACAT1(WT)

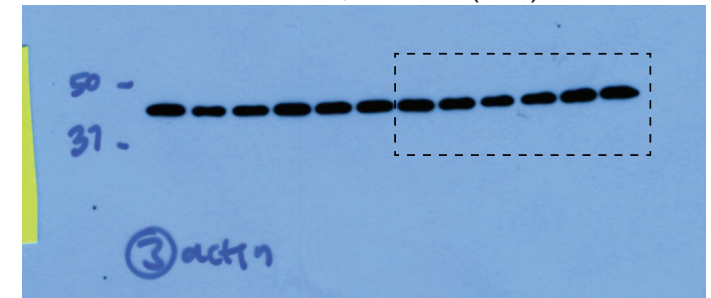

Actin  
ACAT1 KO;hACAT1(H460A)

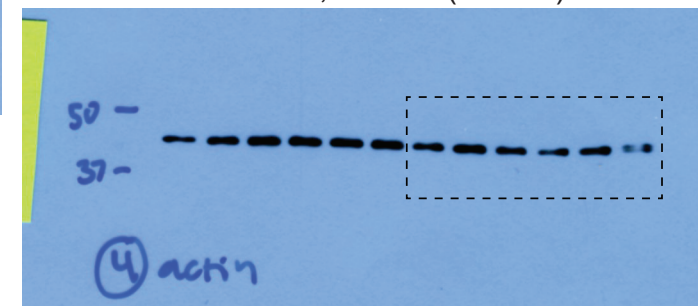

Supplement: fig2-figsupp3-data1 [file elife-83534-fig2-figsupp3-data1-v3.zip]
