# Supplementary material for: A concerted mechanism involving ACAT and SREBPs by which oxysterols deplete accessible cholesterol to restrict microbial infection
Source: eLife journal article supplement (doi:10.7554/elife.83534), 2023-01-25
Supplement: fig2-figsupp5-data1 [file Figure 2-figure supplement 5-source data 1.xlsx]

## Sheet: Figure 2 figure supplement 5A
CHO-K1
Cell Line	WT				Scap-deficient
25HC (µM)	Bound ALOD4		Bound OlyA		Bound ALOD4		Bound OlyA
0	100	0	100	0	100	0	100	0
0.5	64.38	8.09	89.51	8.76	16.3	6.87	105.79	4.75
1	52.03	3.62	106.1	8.22	5.67	1.11	103.57	9.16
2.5	21.33	9.33	95.97	7.19	6.2	1.51	96.11	2.87
5	9.62	4.7	93.69	4.88	5.73	1.56	99.57	6.26
10	4.16	1.02	96.17	8.54	6.17	3.63	105.64	5.05
	Mean (n=3)	SEM	Mean (n=3)	SEM	Mean (n=3)	SEM	Mean (n=3)	SEM

## Sheet: Figure 2 figure supplement 5B
HEK293A
Cell Line	WT				LXRa; LXRb-deficient
25HC (µM)	Bound ALOD4		Bound OlyA		Bound ALOD4		Bound OlyA
0	100	0	100	0	100	0	100	0
0.5	85.86	4.42	95.12	3.02	75.87	6.67	106.3	5.85
1	56.13	5.48	96.11	10.33	36.14	8.09	105.67	7.83
2.5	24.81	6.31	95.97	10.52	6.29	2.31	98.2	8.61
5	8.3	2.87	96.39	7.06	5.66	1.17	95.73	4.55
10	6.05	1.9	96.17	9.63	3.92	1.26	90.85	4.91
	Mean (n=3)	SEM	Mean (n=3)	SEM	Mean (n=3)	SEM	Mean (n=3)	SEM
