# Supplementary material for: A concerted mechanism involving ACAT and SREBPs by which oxysterols deplete accessible cholesterol to restrict microbial infection
Source: eLife journal article supplement (doi:10.7554/elife.83534), 2023-01-25
Supplement: fig3-figsupp1-data1 [file Figure 3-figure supplement 1-source data 1.xlsx]

## Sheet: Figure 3 figure supplement 1A
CHO-K1	Fraction nuclear SREBP2
Cell Line	WT		ACAT1 KO
HPCD (min)
0	1.84	0.15	2.42	0.99
15	2.3	0.27	4.19	1.03
30	21.92	3.05	26.85	2.52
60	81.19	7.05	86.56	9.04
120	96.12	5.94	98.3	5.73
	Mean (n=3)	SEM	Mean (n=3)	SEM

## Sheet: Figure 3 figure supplement 1B
	Fraction nuclear SREBP2
	WT		ACAT1 KO
FCS (% v/v)
0	72.22	8.73	87.41	8.14
5	38.07	5.95	42.98	9.43
10	23.53	7.91	12.28	4.15
15	17.53	4.72	7.01	2.45
20	9.13	1.74	5.46	2.3
25	4.9	1.63	2.43	0.89
30	2.58	0.75	1.94	0.31
	Mean (n=3)	SEM	Mean (n=3)	SEM

## Sheet: Figure 3 figure supplement 1C
	Fraction nuclear SREBP2
	WT		ACAT1 KO
Chol/CD
0	86.58	6.75	69.24	5.72
5	85.52	6.21	75.99	9.66
10	72.36	5.82	64.51	5.39
25	41.98	6.84	51.46	3.82
50	7.41	1.68	10.18	2.74
100	5.27	2.05	2.99	0.34
	Mean (n=3)	SEM	Mean (n=3)	SEM
