# Supplementary material for: A concerted mechanism involving ACAT and SREBPs by which oxysterols deplete accessible cholesterol to restrict microbial infection
Source: eLife journal article supplement (doi:10.7554/elife.83534), 2023-01-25
Supplement: fig4-data1 [file elife-83534-fig4-data1-v2.zip]

A

Figure 4 - Source Blots

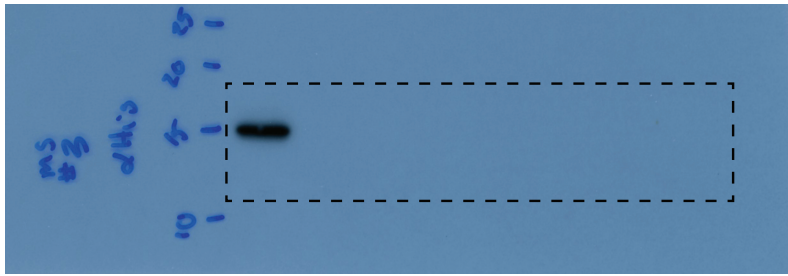

ALOD4/His

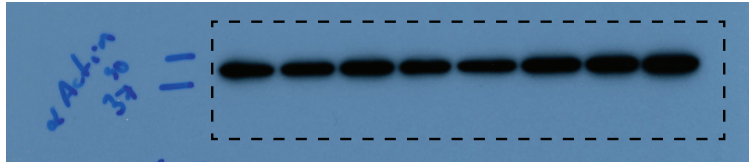

Actin

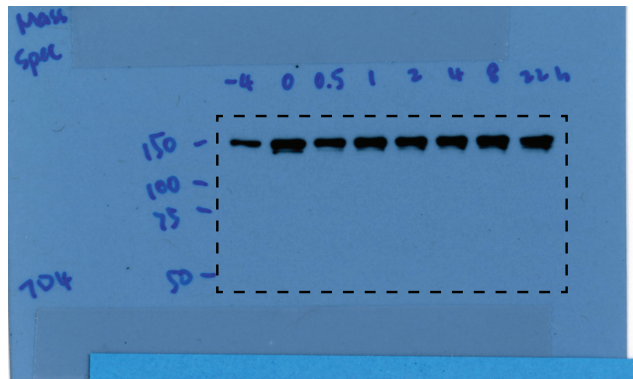

SREBP2/7D4

B

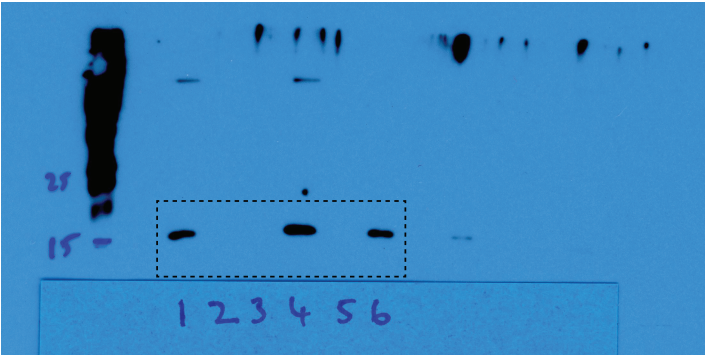

ALOD4/His for N-BP1a cells

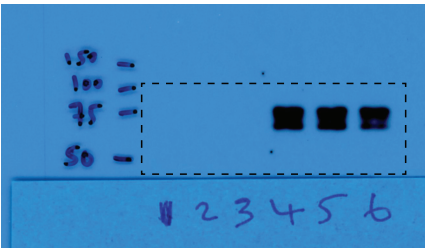

N-BP1a/FLAG

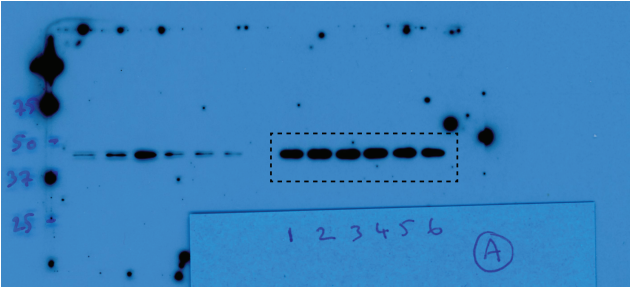

Actin for N-BP1a cells

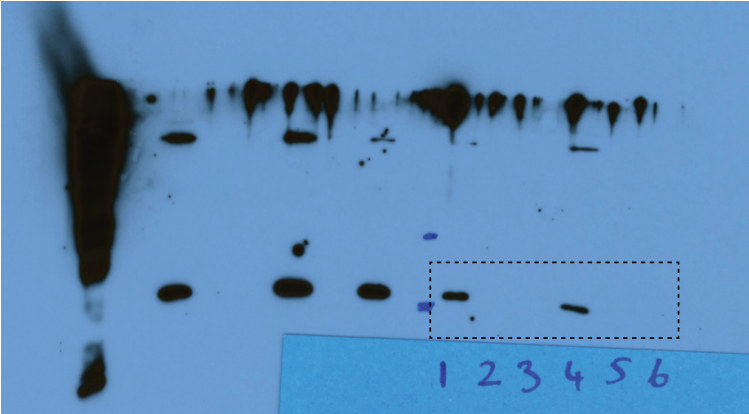

ALOD4/His for N-BP1c cells

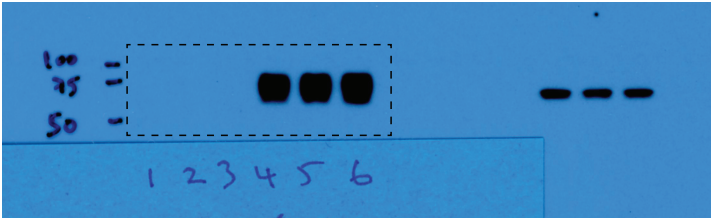

N-BP1c/FLAG

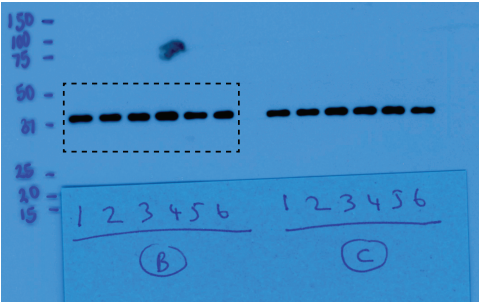

Actin for N-BP1c cells

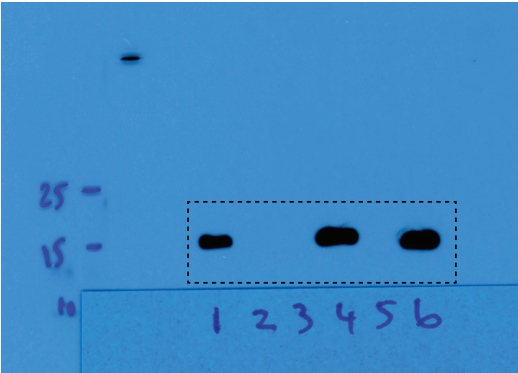

ALOD4/His for N-BP2 cells

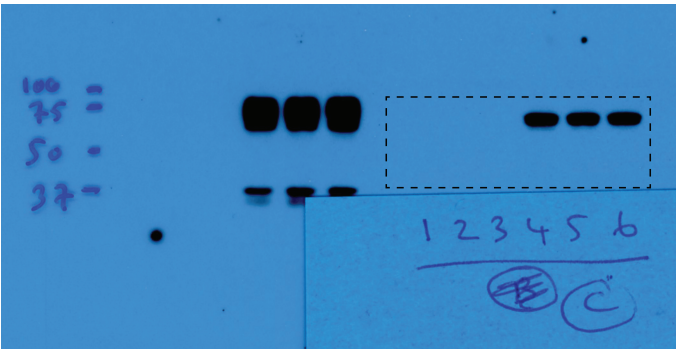

N-BP2/FLAG

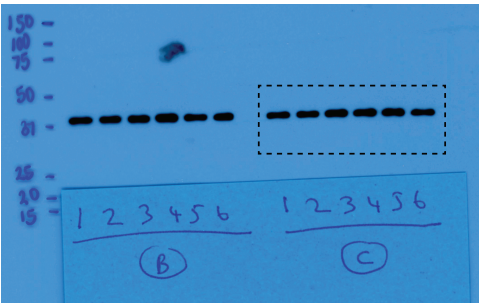

Actin for N-BP2 cells



C

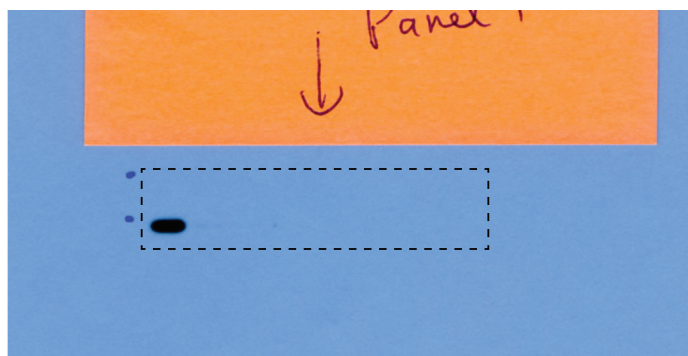

ALOD4/His for None

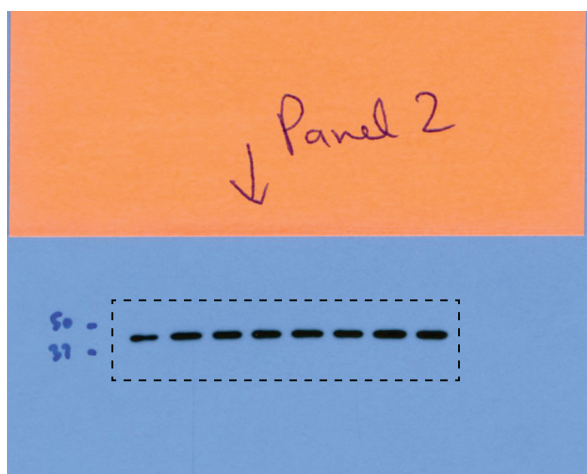

Actin for None

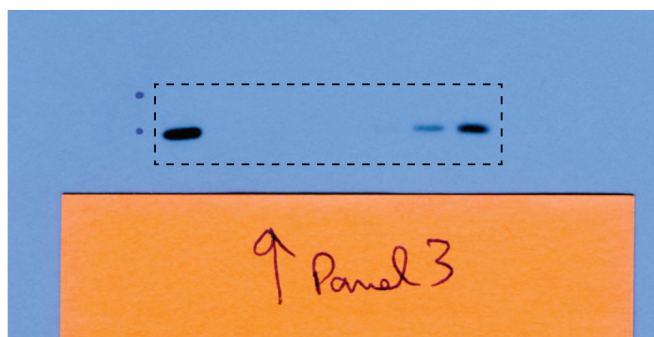

ALOD4/His for 10 uM Inhibitor

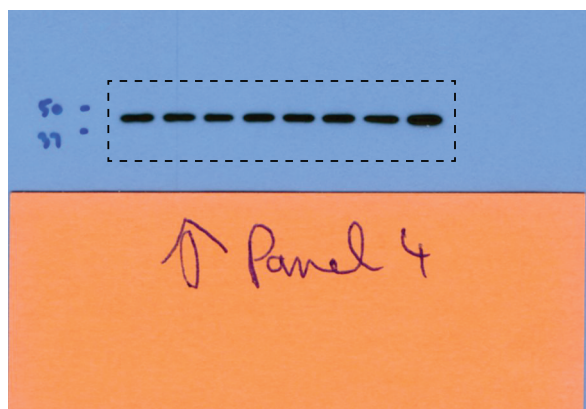

Actin for 10 uM Inhibitor

D

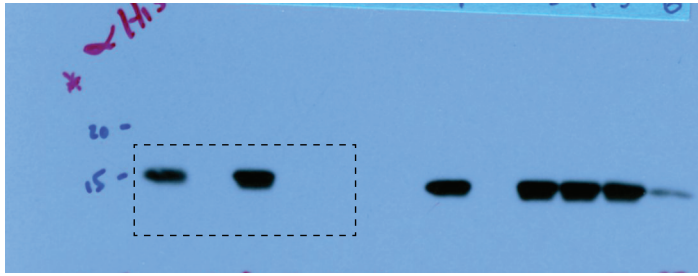

ALOD4/His for WT cells

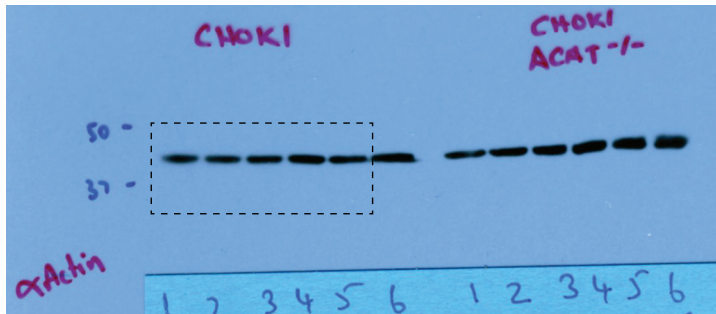

Actin for WT cells

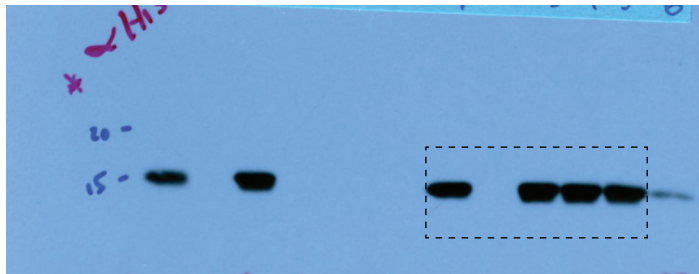

ALOD4/His for ACAT1 KO cells

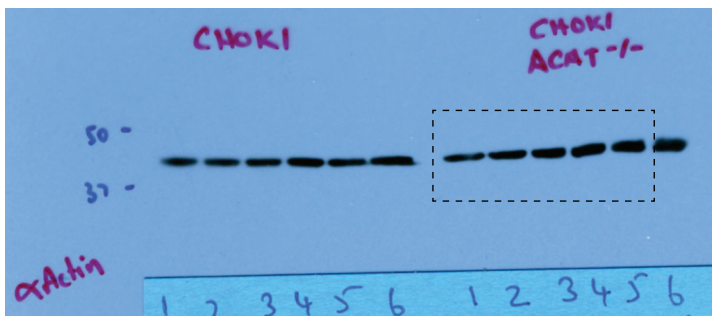

Actin for ACAT1 KO cells
