# Supplementary material for: A concerted mechanism involving ACAT and SREBPs by which oxysterols deplete accessible cholesterol to restrict microbial infection
Source: eLife journal article supplement (doi:10.7554/elife.83534), 2023-01-25
Supplement: fig4-data2 [file Figure 4-source data 2.xlsx]

## Sheet: Figure 4A
	Cellular 25HC (ng/µg of total protein)
Time (h)	Run 1	Run 2	Run 3
-	0.03	0	0.01
0	4.46	4.22	3.78
0.5	3.22	4.4	2.7
1	1.8	4.24	2.6
2	1.8	2.68	2.51
4	1.61	2.49	2.4
8	1.78	2.11	1.51
22	0.61	0.23	0.21

## Sheet: Figure 4 figure supplement 2A
	Timing (h)	BP1a		BP1c		BP2
No	-	100	0	100	0	100	0
Muristerone	0	8.62	5.95	12.39	3.33	6.79	1.5
	22	4.59	1.13	3.71	1.55	4.46	1.78
With	-	110.63	9.05	87.19	6.13	117.02	13.27
Muristerone	0	9.13	2.58	7.32	1.17	9.45	1.04
	22	80.26	4.17	2.16	0.62	96.78	11.93
		Mean (n=3)	SEM	Mean (n=3)	SEM	Mean (n=3)	SEM

## Sheet: Figure 4 figure supplement 2B
	ACAT inhibitor
Timing (h)	None		10 µM
-4	100	0	100	0
0	10.1614	7.47981	9.43839	5.46821
0.5	0.609943	0.31552	1.61295	0.433866
1	0.28768	0.28768	2.21809	2.21809
2	0.0698074	0.0698074	2.20889	2.20889
4	0.0565448	0.0565448	24.2447	7.71788
8	1.23221	1.17506	60.444	5.89278
22	3.28217	1.99363	62.6014	18.4034
	Mean (n=3)	SEM	Mean (n=3)	SEM

## Sheet: Figure 4 figure supplement 2C
		Treatment					Treatment
		None	HPCD		25HC		None	HPCD		25HC
Recovery time (h)		None	0	22	0	22	None	0	22	0	22
	WT	100	4.07	107.43	6.25	4.12	0	2.64	8.98	2.16	0.78
	ACAT1-/-	100	6.02	110.17	92.72	86.18	0	1.06	6.33	3.89	5.23
		Mean (n=3)					SEM
