# Supplementary material for: A concerted mechanism involving ACAT and SREBPs by which oxysterols deplete accessible cholesterol to restrict microbial infection
Source: eLife journal article supplement (doi:10.7554/elife.83534), 2023-01-25
Supplement: fig5-data1 [file Figure 5-source data 1.xlsx]

## Sheet: Figure 5
	CHO-K1
	PFO								ALO
	4HC				25HC				4HC				25HC
uM Oxysterol	Run 1	Run 2	Run 3		Run 1	Run 2	Run 3		Run 1	Run 2	Run 3		Run 1	Run 2	Run 3
0	100	100	100		100	100	100		100	100	100		100	100	100
0.25	100.6	105.41	90.21		27.8	92.11	75.59		100.38	104.63	96.78		2.32	83.15	78.9
0.5	106.53	103.71	83.11		12.81	18.63	40.98		105.74	97.15	100.62		2.32	27.74	59.66
1	105.8	106.81	89.49		7.98	17.7	9.59		106.7	98.93	101.14		1.53	10.87	3.97
2.5	107.01	99.54	77.34		4.04	4.15	3.13		91.58	107.24	100.21		3.96	0.89	1.34
5	96.49	97.52	89.8		15.95	5.32	2.29		70.71	101.19	97.3		22.09	2.62	1.62
	CHO-K1 ACAT1 KO
	PFO								ALO
	4HC				25HC				4HC				25HC
uM Oxysterol	Run 1	Run 2	Run 3		Run 1	Run 2	Run 3		Run 1	Run 2	Run 3		Run 1	Run 2	Run 3
0	100	100	100		100	100	100		100	100	100		100	100	100
0.25	102.35	81.71	100.38		98.66	74.02	94.71		106.81	96.82	93.25		80.97	89.83	82.99
0.5	104.54	100.85	106.3		100	81.2	93.7		97.65	94.7	95.89		104.93	94.28	79.32
1	107.06	100.34	101.01		90.75	81.54	87.52		115.27	101.06	95.89		102.82	100.21	89.44
2.5	108.4	74.36	84.37		95.97	72.48	75.17		103.05	104.45	104.99		92.25	92.37	82.84
5	93.95	78.29	85.13		94.79	62.91	88.4		103.05	100.85	94.28		87.78	82.84	95.75
	CHO-K1 ACAT1 KO ;hACAT1(WT)
	PFO								ALO
	4HC				25HC				4HC				25HC
uM Oxysterol	Run 1	Run 2	Run 3		Run 1	Run 2	Run 3		Run 1	Run 2	Run 3		Run 1	Run 2	Run 3
0	100	100	100		100	100	100		100	100	100		100	100	100
0.25	91.49	81.95	104.09		3.14	30.5	16.21		84.03	96.33	94.46		14.75	52.28	24.11
0.5	84.12	61.62	92.37		3.85	4.77	6.68		100.47	76.51	102.38		16.77	6.75	13.02
1	87.06	70.75	91.42		8.47	3.46	0.68		75.11	85.32	97.78		30.01	4.44	6.05
2.5	89.03	67.84	86.65		7.32	2.14	0.27		114.56	86.05	109.19		26.73	2.09	5.58
5	97.05	78.22	81.2		4.54	2.47	-4.18		92.48	101.1	98.26		18.74	2.68	0.4
	CHO-K1 ACAT1 KO;hACAT1(H460A)
	PFO								ALO
	4HC				25HC				4HC				25HC
uM Oxysterol	Run 1	Run 2	Run 3		Run 1	Run 2	Run 3		Run 1	Run 2	Run 3		Run 1	Run 2	Run 3
0	100	100	100		100	100	100		100	100	100		100	100	100
0.25	94.68	92.27	105.39		82.18	98.95	81.04		92.94	86.42	107.44		97.65	100	94.42
0.5	101.23	102.81	112.7		115.77	77.52	89.91		110.76	81.89	110.23		92.27	82.8	106.74
1	94.06	99.65	106.43		100.61	79.63	87.83		114.12	80.08	117.43		88.57	83.7	90.47
2.5	98.16	92.98	101.57		105.32	106.32	86.26		113.11	81.44	121.62		89.91	90.95	94.65
5	81.36	89.11	89.91		69.28	95.08	100		98.66	89.59	106.51		71.42	79.18	93.03

## Sheet: Figure 5 figure supplement 1A
pM, ALO	CHO-K1			ACAT1 KO			ACAT1 KO;hACAT1(WT)			ACAT1 KO;hACAT1(H460A)
	Run 1	Run 2	Run 3	Run 1	Run 2	Run 3	Run 1	Run 2	Run 3	Run 1	Run 2	Run 3
0	0	0	0	0	0	0	0	0	0	0	0	0
10	0	-0.02	-0.04	2.29	-0.12	0.09	3.55	-0.71	-0.39	-0.24	-0.33	0.58
25	0.23	0	0	4.67	7.37	2.18	-1.6	-0.66	0.13	1.03	6.94	3.58
50	0.24	0.3	0.06	12.49	14.31	9.29	-1.23	0.04	0.43	5.78	23.35	13.83
100	4.43	7.38	3.07	46.5	52	39.23	1.4	3.57	0.83	16.76	80.1	33.96
250	67.43	75.54	53.96	96.09	100.05	74.89	26.75	37.87	14.32	57.43	98.76	54.78
500	99.96	89.61	91.7	86.55	97.97	100	96.7	86.72	75.5	99.32	99.27	79.85
1000	94.56	99.94	100	98	78.54	88.74	95.27	100.42	100	82.09	90.69	100

## Sheet: Figure 5 figure supplement 1B
pM, PFO	CHO-K1			ACAT1 KO			ACAT1 KO;hACAT1(WT)			ACAT1 KO;hACAT1(H460A)
	Run 1	Run 2	Run 3	Run 1	Run 2	Run 3	Run 1	Run 2	Run 3	Run 1	Run 2	Run 3
0	0	0	0	0	0	0	0	0	0	0	0	0
10	17.91	1.07	8.48	39.48	11.91	24.07	7.53	1.17	1.81	38.75	17.72	35.62
25	41.09	6.5	43.21	49.87	23.16	45.78	23.39	1.8	9.96	55.48	33.1	61.32
50	69.83	24.7	77.2	70.22	38.04	66.25	53.35	3.98	30.11	73.67	48.04	63.97
100	82.51	69.54	89.21	85	76.16	82.45	87.55	28.38	75.71	75.41	74.09	70.39
250	100	90.69	100	89.61	100	95.28	100	85.97	98.24	82.25	80.21	93.45
500	99.23	98.31	98.27	96.36	86.45	100	98.47	99.48	100	90.4	100	100
1000	94.86	100	91.04	100	94.8	88.64	93.19	100	100	100	87.62	96.85
