# Supplementary material for: A concerted mechanism involving ACAT and SREBPs by which oxysterols deplete accessible cholesterol to restrict microbial infection
Source: eLife journal article supplement (doi:10.7554/elife.83534), 2023-01-25
Supplement: fig6-data1 [file Figure 6-source data 1.xlsx]

## Sheet: Figure 6A
4HC Treatment - Relative Infection										25HC Treatment - Relative Infection
	WT		ACAT1 KO		ACAT1- KO;hACAT1(WT)		ACAT1 KO;hACAT1(H460A)				WT		ACAT1 KO		ACAT1- KO;hACAT1(WT)		ACAT1 KO;hACAT1(H460A)
Oxysterol, μM	Average	SEM	Average	SEM	Average	SEM	Average	SEM		Oxysterol, μM	Average	SEM	Average	SEM	Average	SEM	Average	SEM
0	100	0	100	0	100	0	100	0		0	100	0	100	0	100	0	100	0
0.25	104.8	2.56	102.25	11.27	95.63	3.77	96.61	1.44		0.25	99.94	5.26	96.47	4.27	107.05	7.14	99.52	7.67
0.5	102.65	2.29	100.91	8.79	96.66	1.72	95.56	0.34		0.5	74.94	8.86	96.63	3.54	83.71	2.84	93.9	3.7
1	106.91	2.44	105.44	7.33	99.57	4.91	92.63	0.69		1	54.43	9.61	98.54	3.39	64.9	1.88	91.36	2.87
2.5	93.57	6.44	108.85	10.34	101.36	3.31	100.27	1.37		2.5	55.86	8.31	106.32	4.38	60.02	9.54	87.04	2.87
5	97.58	4.93	98.05	8.02	97.05	9.54	98.98	1.98		5	39.3	8.99	96.46	1.51	45.52	6.01	94.12	8.95

## Sheet: Figure 6B
Wild-type (Soat+/+) Mice CFU recovery
Liver			Spleen			Caecum Tissue
EtOH	25HC		EtOH	25HC		EtOH	25HC
1316	1100		115974	21148		17089	232089
4576	1720		515346	20309		25104	3618182
754	1277		739130	42169		19048	25824
1449	1681		81118	29047		59615	18452
6134	54		172673	5701		87603	136667
2705	438		19223	8204		90265	396667
1773	242		75729	38331		66387	52553
56	697		12705	40404		21270	176250
27645	548		46813	399		20000	2558
16345	1628		397647	72464		11737	5263
3232	2800		457270	60399		12639	3333
5056	2581		333050	7377		9252	7143
3878	66		226756	62173			3673
2536	282		111367	29460
3854	0		51343	11040
3554	0		16976	40974
8389	531		42683	23953
2333	1031		16384	98913
ACAT1 KO (SOAT1-/-) Mice CFU recovery
Liver			Spleen			Caecum Tissue
EtOH	25HC		EtOH	25HC		EtOH	25HC
55	121		34987	6467		24643	16214
733	2318		55344	15174		22963	6840
433	127		82704	54027		36491	43478
500	479		17029	31850		33562	12911
259	486		70823	4228		21895	17037
447	791		8628	17318		2281	4839
542	947		10664	12994		12766	3429
269	8475		25235	117712		4928	412
1201	1650		32025	69728		21754	19333
2763	477		290	11475		13016	4444
316	1563		5866	14269		8598	3208
603	168		39384	51327		24135	26241
726	1026		77093	6471			8000
4412	6023		66485	7061
568	1943		69725	27824
1246	277		17994	73753
984	723		50590	29564

## Sheet: Figure 6 figure supplement 1
	CFU Recovery (Log10)
CHO-K1 Cell line	Average	SEM
WT	6.10355	0.0606462
ACAT1 KO	6.10765	0.0608024
ACAT1 KO;hACAT1(WT)	6.1948	0.00873329
ACAT1 KO;hACAT1(H460A)	6.21462	0.0217688
