# Supplementary material for: A concerted mechanism involving ACAT and SREBPs by which oxysterols deplete accessible cholesterol to restrict microbial infection
Source: eLife journal article supplement (doi:10.7554/elife.83534), 2023-01-25
Supplement: fig7-data1 [file Figure 7-source data 1.xlsx]

## Sheet: Figure 7A
	EtOH			25HC			4HC
Huh7.5	100	100	100	59.74	34.74	42.89	97.53	95.44	109.47
Huh7.5 DACAT	145.92	197	146	133.4	173	131	135.12	167	138

## Sheet: Figure 7B
	EtOH			25HC			4HC
Huh7.5	100	100	100	57.78	42.19	28.54	99.75	84.6	97.8
Huh7.5 DACAT	68.89	53	45	56.3	32.07	36.83	71.6	43.88	46.34

## Sheet: Figure 7 figure supplement 1B
	Cell Type
25HC (µM)	Huh7.5(WT)		Huh7.5 DACAT
0	0.09	0.02	0.05	0.01
5	1.24	0.28	0.04	0.02
	Mean (n=3)	SEM	Mean (n=3)	SEM
