# Supplementary material for: A concerted mechanism involving ACAT and SREBPs by which oxysterols deplete accessible cholesterol to restrict microbial infection
Source: eLife journal article supplement (doi:10.7554/elife.83534), 2023-01-25
Supplement: fig7-figsupp1-data1 [file elife-83534-fig7-figsupp1-data1-v2.zip]

Figure 7 figure supplement 1 - Source Blots

C

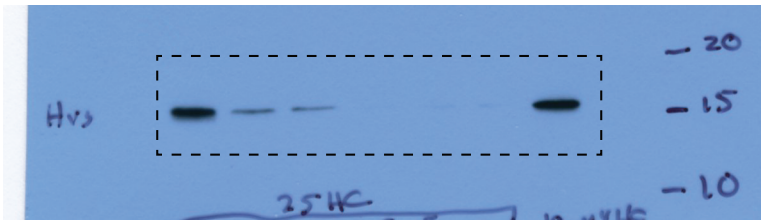

ALOD4/His  
for Huh7.5 cells

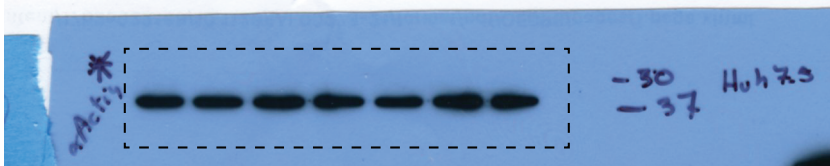

Actin for  
Huh7.5 cells

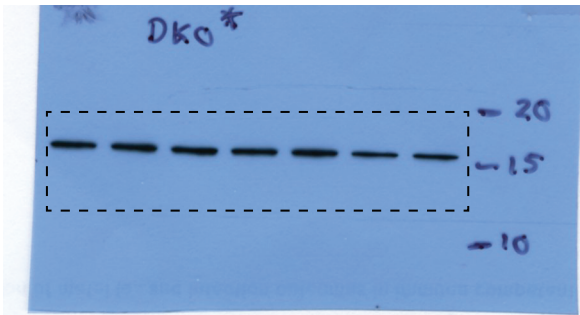

ALOD4/His  
for Huh7.5 $\Delta$ ACAT cells

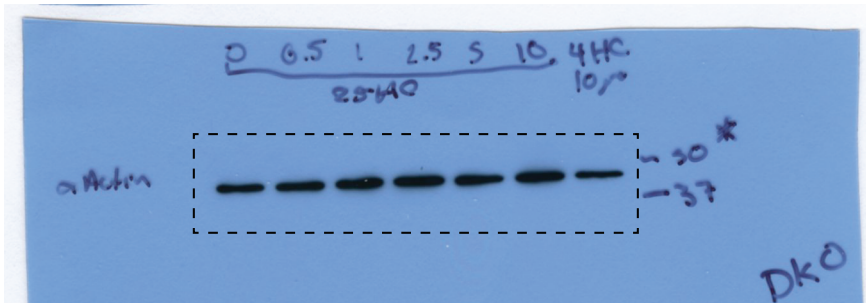

Actin for  
Huh7.5 $\Delta$ ACAT cells
