# Supplementary figures and images for: A concerted mechanism involving ACAT and SREBPs by which oxysterols deplete accessible cholesterol to restrict microbial infection
Source: eLife journal article supplement (doi:10.7554/elife.83534), 2023-01-25

Figure 1 - Source Blots

A

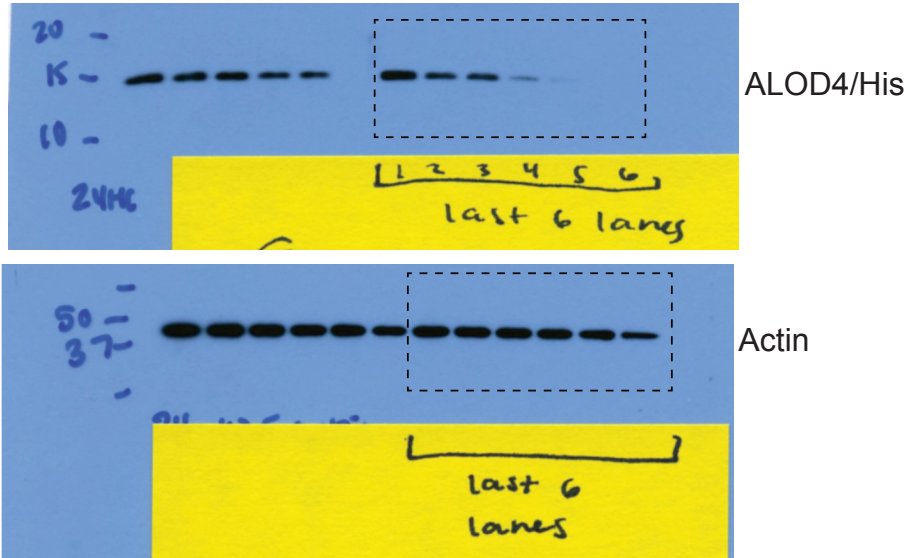

B

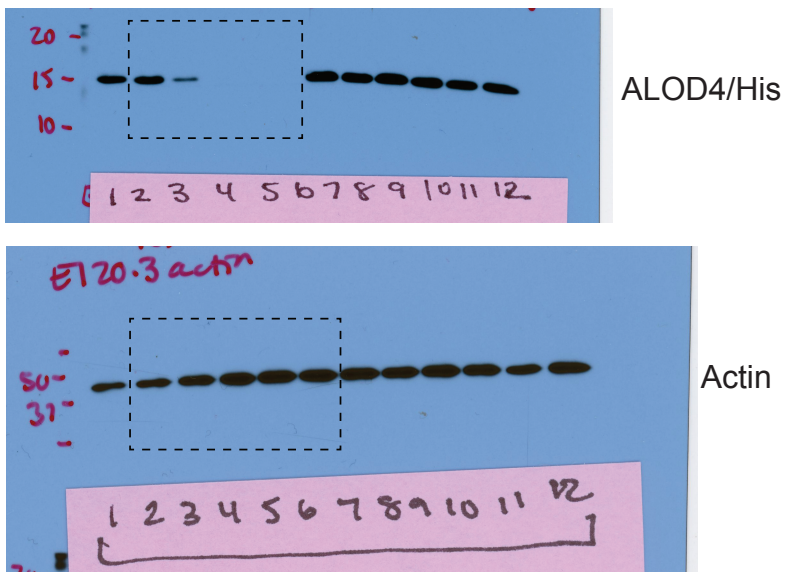

D

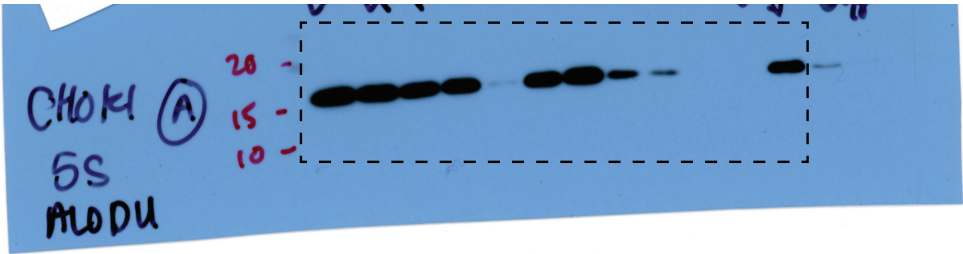

ALOD4/His

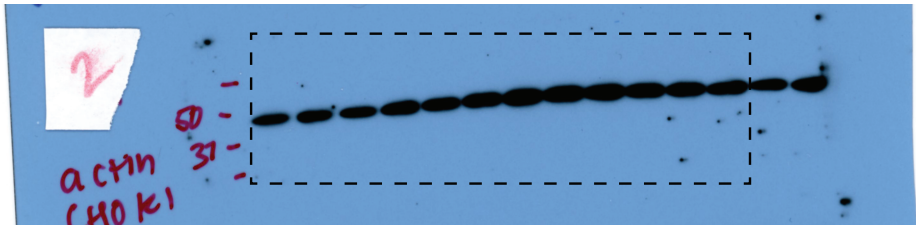

Actin

E

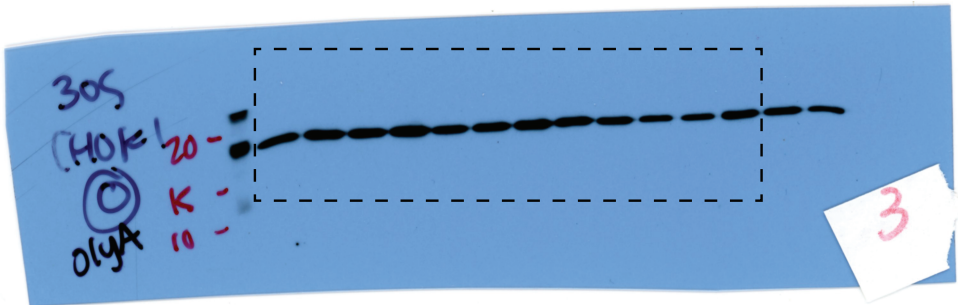

OlyA/His

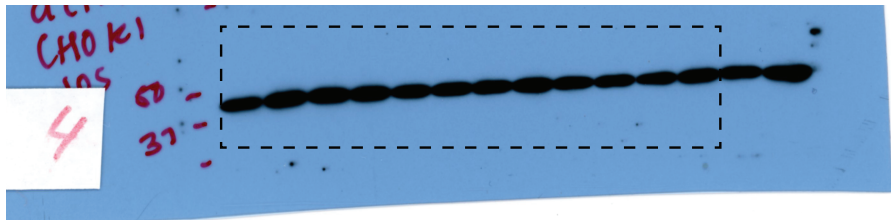

Actin

G

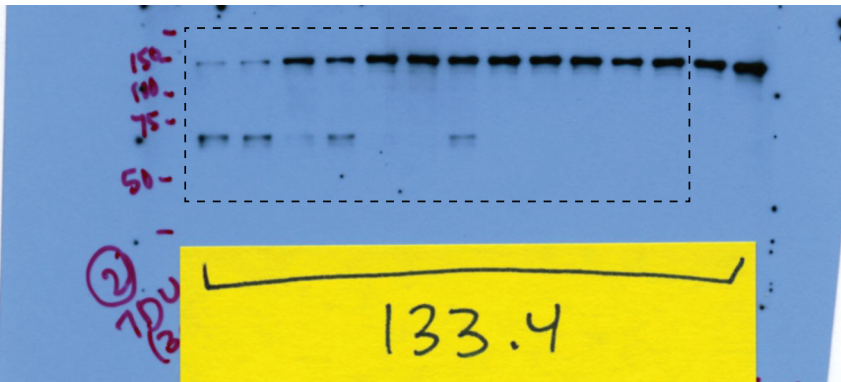

SREBP2/7D4

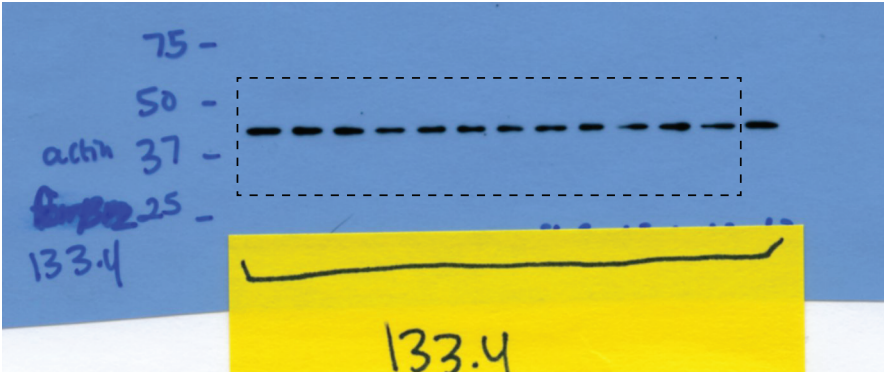

Actin

Supplement: fig1-data1 [file elife-83534-fig1-data1-v3.zip]

Figure 2 figure supplement 1 - Source Blots

B

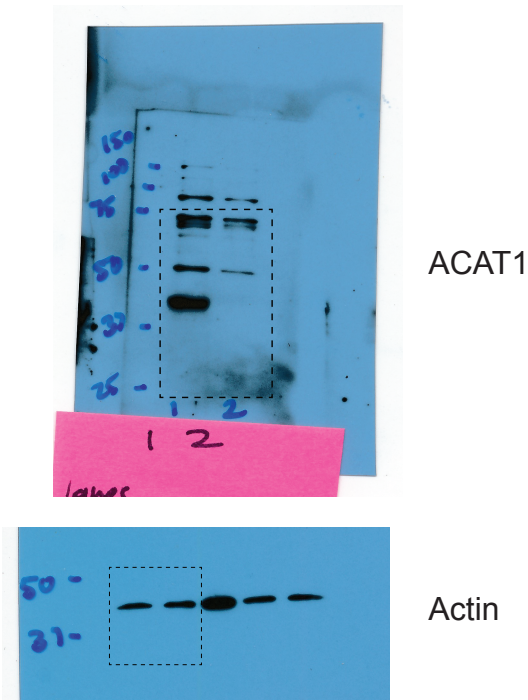

C

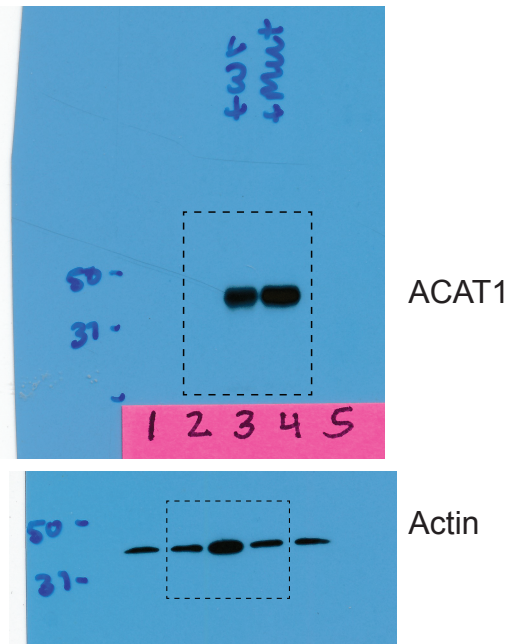

Supplement: fig2-figsupp1-data1 [file elife-83534-fig2-figsupp1-data1-v3.zip]

Figure 2 figure supplement 4 - Source Blots

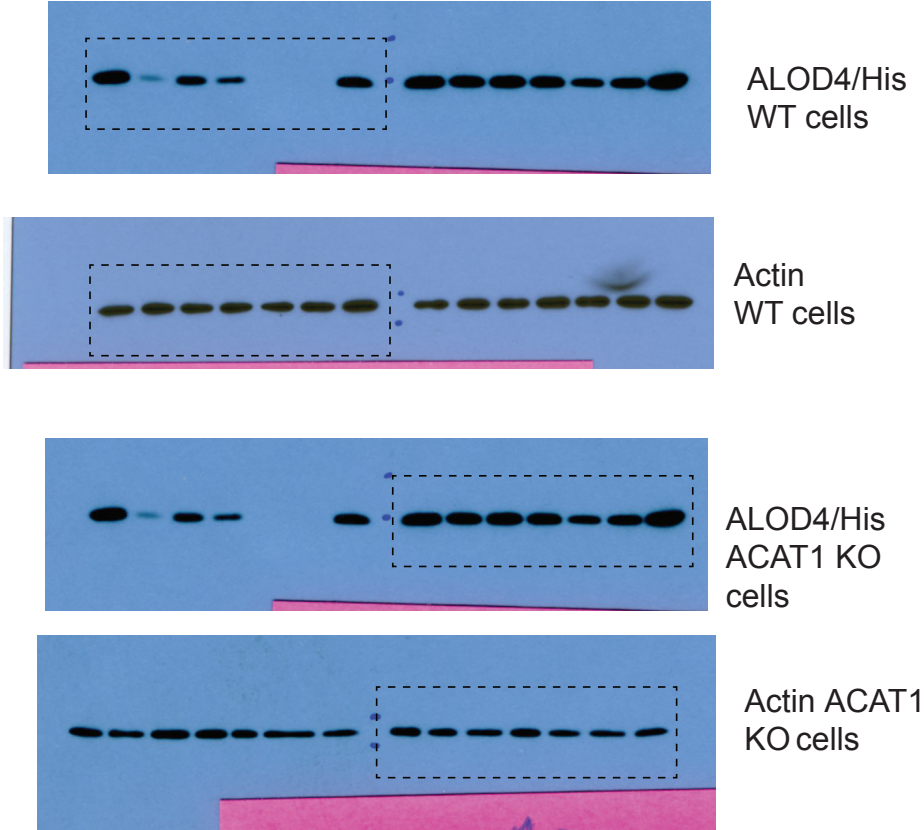

Supplement: fig2-figsupp4-data1 [file elife-83534-fig2-figsupp4-data1-v3.zip]

# Figure 3 - Source Blots

C

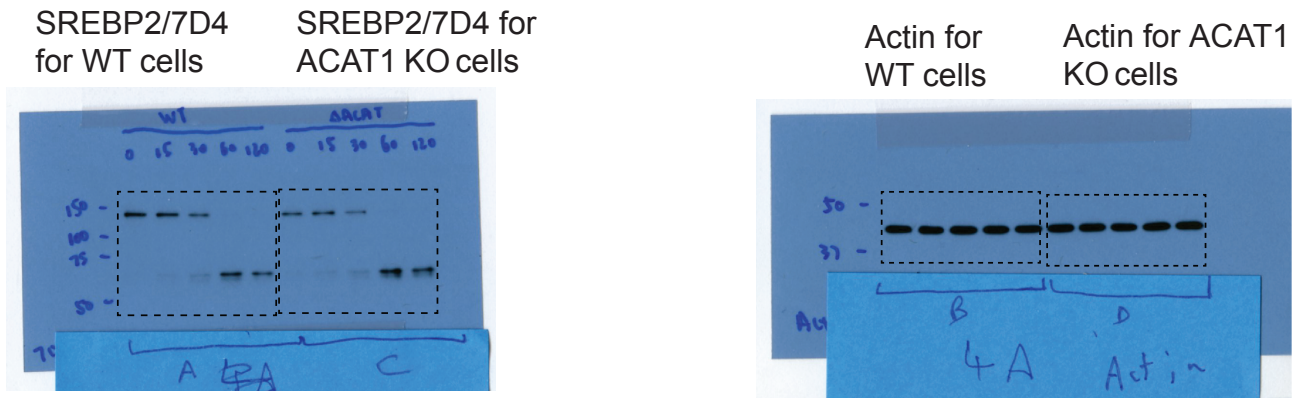

D

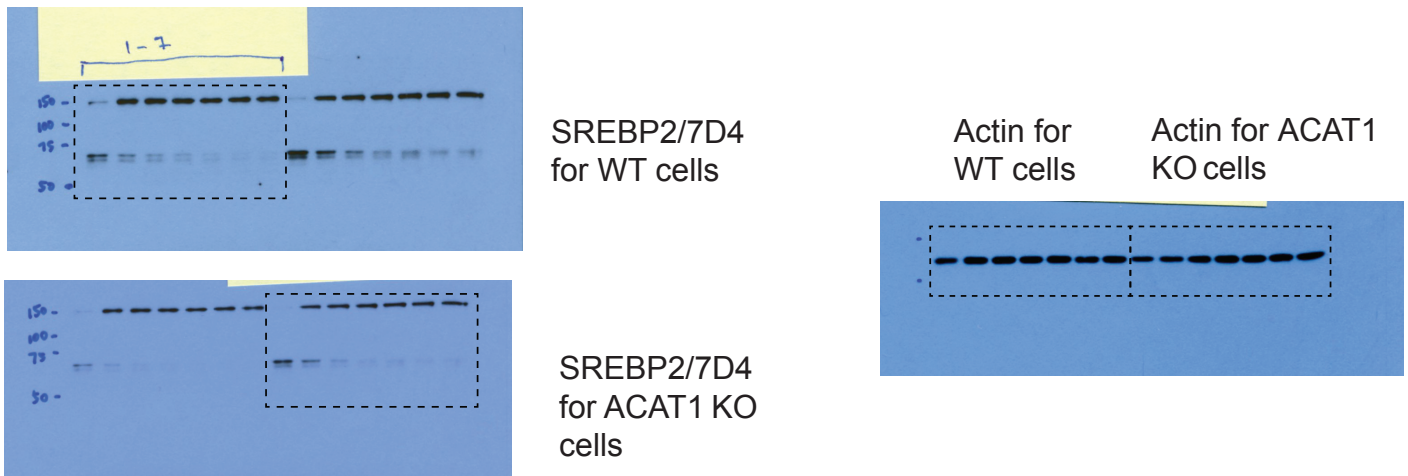

E

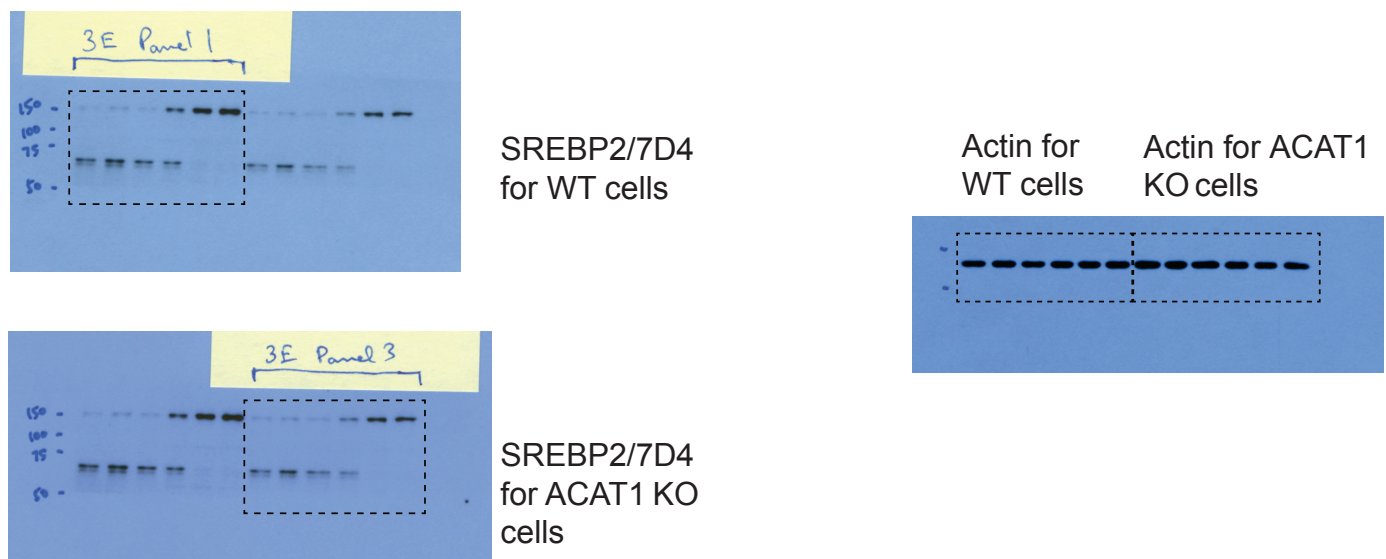

Supplement: fig3-data1 [file elife-83534-fig3-data1-v3.zip]

## Figure 4 figure supplement 1- Source Blots

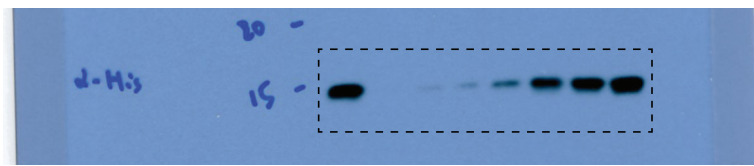

ALOD4/His

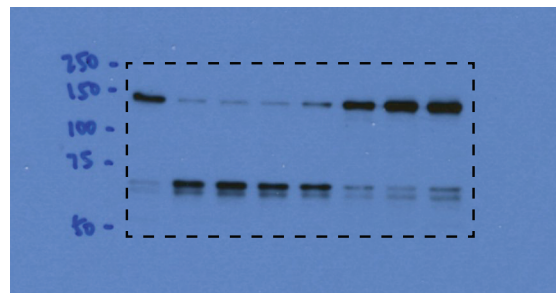

SREBP2/7D4

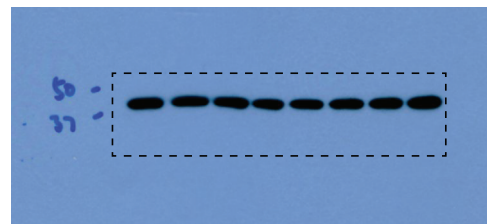

Actin

Supplement: fig4-figsupp1-data1 [file elife-83534-fig4-figsupp1-data1-v3.zip]
